# Supplementary material for: The Exploitation of Sodium Deoxycholate-Stabilized Nano-Vesicular Gel for Ameliorating the Antipsychotic Efficiency of Sulpiride
Source: MDPI journal article supplement (doi:10.3390/gels10040239), 2024-03-31
Supplement: s1 [file s1]

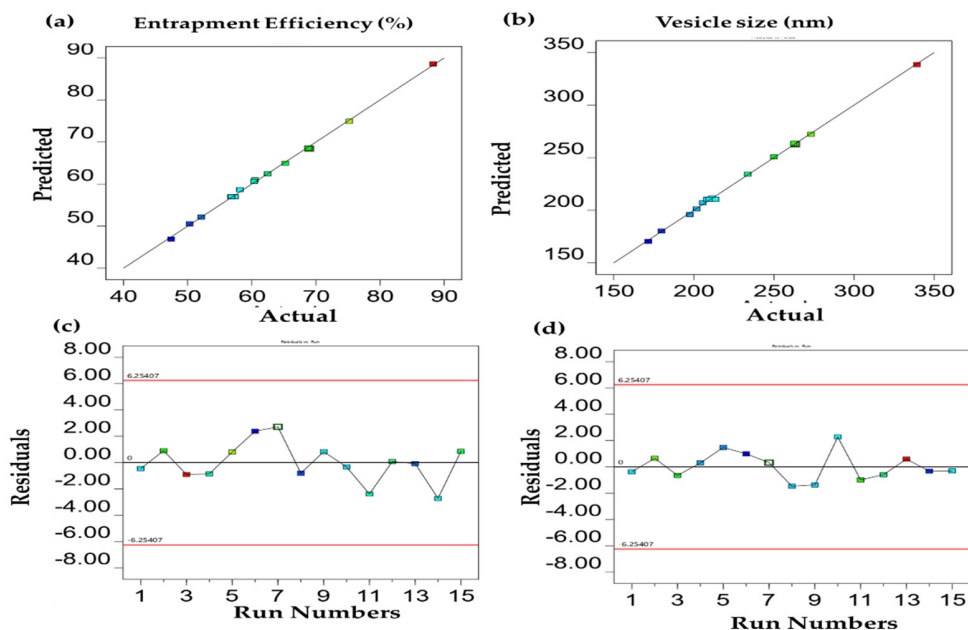

**Figure S1.** Linear correlation plots (a,b) between predicted and actual values and (c,d) the corresponding residual plots for different responses.

**Table S1.** Results of statistical analysis of all dependent variables  $Y_1$  and  $Y_2$ .

| Source                                                 | $Y_1$   |           | $Y_2$   |           |
|--------------------------------------------------------|---------|-----------|---------|-----------|
|                                                        | F-value | p-value   | F-value | p-value   |
| Model                                                  | 480.16  | < 0.0001* | 563.56  | < 0.0001* |
| X <sub>1</sub> : Lipid concentration (%)               | 1665.44 | < 0.0001* | 496.11  | < 0.0001* |
| X <sub>2</sub> : Edge activator, SDC (%)               | 306.81  | < 0.0001* | 851.82  | < 0.0001* |
| X <sub>3</sub> : Surfactant concentration, Span 60 (%) | 50.58   | 0.0009*   | 1272.61 | < 0.0001* |
| Lack of Fit                                            | 3.81    | 0.2150    | 0.4224  | 0.7584    |
| R <sup>2</sup> analysis                                |         |           |         |           |
| R <sup>2</sup>                                         | 0.9988  |           | 0.9990  |           |
| Adjusted R <sup>2</sup>                                | 0.9968  |           | 0.9972  |           |
| Predicted R <sup>2</sup>                               | 0.9839  |           | 0.9925  |           |
| Adequate Precision                                     | 86.2734 |           | 90.6236 |           |

X<sub>1</sub>- Lipid concentration (%); X<sub>2</sub>- edge activator (SDC) concentration (%); X<sub>3</sub>- surfactant concentration (%);  $Y_1$ , EE (%);  $Y_2$ , particle size (nm); \*, significant.
